# Supplementary material for: Survey of the Bradysia odoriphaga Transcriptome Using PacBio Single-Molecule Long-Read Sequencing
Source: MDPI journal article supplement (doi:10.3390/genes10060481), 2019-06-25
Supplement: s1 [file s1]

Table S1: Values of samples detected by Agilent 2100

| Development stages  | Concentration (ng/ $\mu$ L) | Volume( $\mu$ L) | total amount ( $\mu$ g) | OD260/280 | RIN |
|---------------------|-----------------------------|------------------|-------------------------|-----------|-----|
| Egg                 | 804                         | 60               | 48.24                   | 2.14      | 7.1 |
| Second instar larva | 660                         | 120              | 79.20                   | 2.17      | 7.1 |
| Fourth instar larva | 800                         | 140              | 112.00                  | 2.16      | 6.9 |
| Pupa                | 884                         | 120              | 106.08                  | 2.05      | 7.1 |
| Adults              | 995                         | 120              | 119.40                  | 2.19      | 7.2 |

RIN: RNA integrity number
