# Supplementary material for: Survey of the Bradysia odoriphaga Transcriptome Using PacBio Single-Molecule Long-Read Sequencing
Source: MDPI journal article supplement (doi:10.3390/genes10060481), 2019-06-25
Supplement: s1 [file s1]

Figure S1: Sequences of AChE1 and AChE2 in *B. odoriphaga*

B.od-AChE1

>[Bradyia\_odoriphaga]\_6535 2770bp

AATCTCAGTTCAGATAGTGGTACCAAACCTGCGGTGTTTCGAGAGAACTAATAAGTGAA  
TACAAAAAAGGTTTTTTTTGTGGAATATAACAATTATTAACCTTTAGTGGTGACATT  
TGAGTTAAAAATCACATTGAAGTAGACAGTAGAGAAATATAATTTCTAAATGAAAAATT  
AAACAATAAATTCAAACCTGAAAATTGTTTTTTTAAGGAAAAATTACAATTCGAATAAAC  
AGCCAGTGTTCAAGTGTATGTGTATGTGTGTTTAGGACAAATTTCCGATCCAAAAATT  
ATACTAAAGACAAAATCGGTGGATGATATGAAAAATTATAAATATACGATTAACTAACTA  
TCCGGGGACTTTGCTGATTTATTTTGTGATTACATAGGAGAGCTTTTTGTTTTGTTTGT  
TGTTTTGTTTTTAAGGAGAGACGATAGAAGACAATCGAGCCGCCAAAACCAACCGGAC  
ACCCGCTAAGTAATATGGTGCAAGTGATGAACCTCCGGTGTTGACATAAAAATTCTCCA  
AAATGGAGAAACACAGTGGACATTATCGATTCCGGTTAATGCCGCGGCCTATACGACTA  
CGCCAATTATTATTATGTACAATAGGAATGCTCGGTGTATTCGACCATATACTGGTCAAT  
GCCGGCATCGTGAATTAGAGAATGCTCAAATTCAATTAAGTCAAAAACACAATTCACA  
ATCATCGTCGGTGCCAAATGATGATGATGCCTTTTTTACCCCATATCTTGGTCATGGTGA  
AGCCGTCAGAGTATTAGATGCAGAGCTGGGAACTTTGGAAATGGAACAATTTAGGGAT  
ACCAAAGCGTTAACACGCCGAGAGGCGTCAGTAGAAGGGAATCATCGTCGCATGATC  
CAGACGACGACGATCCGATGGTAATCACAACCGACAAAGGTAAAATTCGAGGCACAG  
TGCTGACATCGGGTAGTGGACGAAAGGTTCGATGCATGGCTCGGCATACCATATGCGCA  
ACCACCAATCGGTGCATTACGCTATCGACTTCCACGGCCTATCGAACGATGGACTGGCG  
TTCGAAACGCAACAACACCATCGAATTCCTGTGTTCAAATTGTGGATGTTGTATTTGGC  
GATTTTCCGGGCGCCACAATGTGGAATCCCAATACGCCACTATCCGAAGATTGTCTCTA  
CATAAATGTGGTGGTTCCTAGGCCTAGACCAAAAATGCGCCTGTAATGTTGTGGATATT  
TGGAGGTGGATTTTATTCGGGCACTGCAACGCTAGATGTGTACGATCACAAAACACTTG  
CTGCTGAAGAGAATGTCATTGTCTGTTTCAATGCAATACAGAGTGGCGAGTCTTGGTTTC  
CTTACCTGGGAACACCAGATGCACCAGGAAATGCTGGTCTCTTTGATCAAAATTTAGC  
ACTGAGATGGGTACGAGACAACATCCATAAATTTGGTGGCGATCCCAACCGAGTCACT  
TTGTTCCGGCGAAAGTGCCGGCGCCGTATCGGTGTCGATGCACTTACTTTTCATCCCTCTC  
ACGAGATCTATTTCAACGAGCCATATTAGAGAGTGGCTCTCCAACAGCTCCCTGGGCTT  
TAATATCCAGAGAAGAAGCTATTTTAAGAGCTCTACGTTTAGCAGAAGCTGTGATTGT  
CCACATGATCGTCACAAGCTAACCGACACCGTTGAATGTCTACGTACGAAGGACGCTA  
AAGAATTGGTTGATAACGAATGGGGAACGTTAGGAATATGCGAGTTTCCCTTCGTACCG  
GTTGTGGATGGTGCATTTTTGGATGAAACACCACAAAAAAGTCTTGCCACGGCCGAT  
TCAAAAAGACAGAAATCTTAACCGGCAGCAACACCGAAGAGGGTTACTATTTTATAAT  
TTATTATCTAACGGAACCTGTACGCAAAGAGGAGGGCGTGACGGTGTCTCGTGAAGAA  
TTTTACCAGGCTGTGAAAGAACTTAATCCATATGTGAATAATCCAGCTAGACAGGCTATT  
ATCTTCGAATACACTGATTGGATCGAACCCGATAATGTACACAACAATCGAGATGCACT  
TGATAAAATGGTGGGTGACCTGCATTTACATGCAATGTTAACGAATTTGCTAATAGATA  
TGCCAAAGAAGGACTTAACGTTTACATGTATTTGTATACACATCGAACGAAAAGTAATC  
CCTGGCCTCGATGGACTGGCGTTATGCATGGCGATGAAATTAATTACATTTTCGGTGAG  
CCATTAAATCCGAATCACAGTTACACTGAGGAGGAAAAGGACTTTAGTCGCAAAATTA  
TGAGATACTGGAGTAATTTTGCTAAGTACGGAGATCCGAATGGTGCGACACCAGATGTT  
CAAGTATGGCCTAAACATACTGCAACTGGAAAACATTACTTGGAGTTGGGTATAAATAC

GACTCATGTGGGACGAGGACCACGGCTTAGACAATGTGCATTTTGGAAAGAGTATTTA  
CCCCAATTGATACAAGCGACATCGCAAACATCAGCTAATCCTACAAGTGAACCATGTGC  
AAATAGTGGCGCTTTAAATGGACACAGTCTCCTATTTCTAATAATAAGTTTTTTCATTTG  
CATTTTACGTTTCGAAAATTTAATTCAAATTTAAAGCGAATTTAAATAAATTGTTTTCTGT  
TCATTTGATTAAAATTTTAAACATAAAAATATATTTATAGAAACAAGAAAACAAACAGA  
AAATTTGATATAGAGAGGGATGTTTCAACTATACATTGGCTATGCTTTATTAAAGTAAAC

Translated amino acid sequence

MLWIFGGGFYSGTATLDVYDHKTLAAEENVIVVSMQYRVASLGFLYLGTPDAPGNAGLFD  
QNLALRWVRDNIHKFGGDPNRVTLFGESAGAVSVSMHLLSSLRDLFQRAILESGSPTAPW  
ALISREEAILRALRLAEAVDCPHDRHKLTDTVECLRTKDAKELVDNEWGTLGICEFPFVPV  
VDGAFLDETPQKSLAHGRFKKTEILTGSNTEEGYYFIIYYLTELRLKEEGVTVSREEFYQAV  
KELNPYVNNPARQAIIFEYTDWIEPDNVHNNRDALDKMVGDLHFTCNVNEFANRYAKEG  
LNVYMYLYTHRTKSNPWRWTGVMHGDEINYIFGEPLNPNHSYTEEEKDFSRKIMRYWS  
NFAKYGDPNGATPDVQVWPKHTATGKHYLELGINTTHVGRGPRLRQCAFWKEYLPQLIQ  
ATSQTSANPTSEPCANS GALNGHSLFLIISFFICILRFENLIQI

B.od-AChE2

>[Bradysia\_odoriphaga]\_9736 2316bp

AGTTTTATTTGAGCCGTTGATTGTTACAGACAGAACATTTTGAACGTATTTCGTTTAACCG  
CATATATTATACACATCCCATAAATACAACCAACAACAAAAAAGTTTAATAAAAAGAAA  
AATTTACCAATCATAAAGTGTTCTGAATTAATAACCAAAACACAGAAAAAACGACAG  
ACAACAAACTTAAAATTATAATGTAGTCAGTAAAAAATGATAAAAACAAATCATTTAA  
AAAAATAGTTCAACGTATCACTCGACAGTAACACGCGAGGTTTTTAAAGTAGAAAGTG  
GAGAAAAATAGTAAAATAGAAAGAAAGGAAAGGAGAAAAAATATTTTCTATTTTATT  
CAACCACCTCAATTATGTTACGCAATTAGTGCCGCTCGTTAGATTACTTATATGTGCCC  
AAGCTATAACATCTGTGTTTCGGGATAATCGATCGTCTGGTGGTGCAAAACCAGTTCAGG  
TCCCATCCGCGGTCTGTTTCGGTCAAAGTTGAGGGTCGTGAAGTGCAATGTGTATACCGGC  
GTTCCGTTTGCAAAGCCACCCATCGACGCATTACGTTTCCGTAAGCCACTTCCAGCCGA  
ACCGTGGCATGGTGTCTGGATGCTACACGTTTGCCGCCCACATGCGTTCAAGAACGG  
TATGAATACTTTCCCGGATTTCAAGGAGAGGATATGTGGAACCCCAACACAAATACATC  
GGAAGATTGTCTGTATTTAAATGTTTGGGCACCGGTGAAACCGAAATTGCGACATGGA  
CGCGGTGCTAATGGAGGCATTGAACATTCAGCCGATTCCGAACATATGAGCGATGAGG  
AGAGCCCATCGAAAACCTGGCCTTCCAATGTTAATTTGGCTATATGGCGGTGGTTTCATG  
AGTGGTTCGTCAACATTAGATATTTATAATGCGGAAATATTGGCTGCGGTGGAACGT  
GATTGTTGCATCGATGCAGTATCGTGTTGGTGCATTTGGATTTTGTATCTGTCACCAAT  
GTTGCCGGGAAATGAGGACGAAGCGCCAGGTAACGTTGGTATGTGGGATCAAGCATTG  
GCTATTCGATGGTTGAAAGATAATGCACGGGGATTCTGGTGGTGATCCGGACCAAATTAC  
ATTATTTGGCGAATCAGCTGGTGGTAGTGCGGTTAATCTACATTTACTGTCACCTGTGAC  
AAGAGGCCTAGCTAGACGTGGTATTTTACAATCAGGTACGTTGAATGCGCCATGGTCCG  
ATATGTCGGGTGAACGTGCTGTGCAAAATTGGTATGTGATTGACGATTGTAACCTGTA  
ATTCATCGATGTTGAGGGAATCTCCAGGGGTGTGTTGGCGTGTATGCGTAGCGTCGAT  
GCGAAAACAATTTCCGTGCAACAATGGAACCTTACTCGGGGATTCTAGGCTTTCCATC  
AGCTCCAACCGTCGATGGTGATTTTCATGCCAGCGGATCCAATGACAATGTTGGCAGAG

GCGGACTTGAGTGAAATTGACATTCTCGTTGGAAGCAATAAGGATGAAGGCACCTACT  
TCCTGCTGTACGACTTTATTGACTACTTTGAAAAAGATTCACCGACGGCGTTACCGCGA  
GAGAAATTCCTTGAAATAATGAACACAATATTCAGTAAAGCATCGGAGGCTGAACGTG  
AAACCATAATATTTTCAGTACACGAATTGGGAGAGCGTTGCTGATGGTTACCAGAATCAA  
TATCAGGTTGGTCAAGCGGTTGGTGATCACTTTTTTCATATGTCCAACAAACGAATACGC  
TCAAGGAATGACTGAACGAGGAGCATCAGTAAAATATTACTATTTCACTCATCGAACCA  
GTACATCGTTATGGGGTGAGTGGATGGGTGTCTTACACGCTGATGAAATTGAGTACATA  
TTTGGCCAACCGATCAATAAATCACTACAGTATCGAGAACGCGAACGAGAATTAAGCC  
GTAGAATGGTGCATGCAGTTAGTGAATTCGCTAGAACCGGCAATCCGGCACCTGATGG  
CGAGACATGGCCTGAATATTCGAAAGAGAATCCCGTTTATTATATTTTAAACGCTGAAG  
GTTTCGAAAGGTGATGAAAAGCAGAAAGCTGACAAACTGGGAAAAGGACCGATGGCA  
ACTGCCTGTGCATTTTGAATGACTATCTACCGCGACTACGAATGTGGGCAGAGCCCCA  
GAATTTGCCATGCATGAATTAGAAGATAGCAGCAGAACTTCGACTTCAACACATATATC  
CGCCCCATCTATGAGTATTGCAATGCTAGTTCTATTGCTAGCTACACACCTATTAACAGG  
GATGTAAACACATATCAATTTACac

Translated amino acid sequence

MWNPNTNTSEDCLYLNWVAPVKPKLRHGRGANGGIEHSADSEHMSDEESPSKTGLPMLI  
WLYGGGFMSGSSTLDIYNAEILAAVGNVIVASMQYRVGAFGFLYLSPMLPGNEDEAPGNV  
GMWDQALAIRWLKDNARGFGGDPDQITLFGESAGGSAVNLHLLSPVTRGLARRGILQSG  
TLNAPWSHMSGERAIVEIGMSLIDDCNCNSSMLRESPGVVLACMRSVDAKTISVQQWNSY  
SGILGFPSAPTVDGDFMPADPMTMLAEADLSEIDILVGSNKDEGTYFLLYDFIDYFEKDSPT  
ALPREKFLEIMNTIFSKASEAERETIIFQYTNWESVADGYQNQYQVGQAVGDHFFICPTNE  
YAQGMTERGASVKYYYFTHRTSTSLWGEWMGVLHADEIEYIFGQPINKSLQYRERERELS  
RRMVHAVSEFARTGNPAPDGETWPEYSKENPVYYIFNAEGSKGDEKQKADKLKGKPMAT  
ACAFWNDYLPRLRMWAEPQNLPCMN
